# 1 Multiple approaches for massively parallel sequencing 2 of HCoV-19 (SARS-CoV-2) genomes directly from clinical 3 samples

4 Minfeng Xiao<sup>1,7\*</sup>, Xiaoqing Liu<sup>2\*</sup>, Jingkai Ji<sup>3,1,7\*</sup>, Min Li<sup>4,1,7\*</sup>, Jiandong Li<sup>4,1,7\*</sup>, Lin  
5 Yang<sup>5\*</sup>, Wanying Sun<sup>4,1,7</sup>, Peidi Ren<sup>1,7</sup>, Guifang Yang<sup>5</sup>, Jincun Zhao<sup>2,8</sup>, Tianzhu  
6 Liang<sup>1,7</sup>, Huahui Ren<sup>1</sup>, Tian Chen<sup>5</sup>, Huanzi Zhong<sup>1</sup>, Wenchen Song<sup>1,7</sup>, Yanqun  
7 Wang<sup>2</sup>, Ziqing Deng<sup>1,7</sup>, Yanping Zhao<sup>1,7</sup>, Zhihua Ou<sup>1,7</sup>, Daxi Wang<sup>1,7</sup>, Jielun  
8 Cai<sup>1</sup>, Xinyi Cheng<sup>1,7,12</sup>, Taiqing Feng<sup>5</sup>, Honglong Wu<sup>6</sup>, Yanping Gong<sup>6</sup>, Huan-  
9 ming Yang<sup>1,9</sup>, Jian Wang<sup>1,9</sup>, Xun Xu<sup>1,10</sup>, Shida Zhu<sup>1,11</sup>, Fang Chen<sup>5,1</sup>, Yanyan  
10 Zhang<sup>5#</sup>, Weijun Chen<sup>6,4#</sup>, Yimin Li<sup>2#</sup>, Junhua Li<sup>1,7#</sup>

11 <sup>1</sup>BGI-Shenzhen, Shenzhen, 518083, China.

12 <sup>2</sup>State Key Laboratory of Respiratory Disease, National Clinical Research Center for Res-  
13 piratory Disease, Guangzhou Institute of Respiratory Health, the First Affiliated Hospital of  
14 Guangzhou Medical University, Guangzhou, China.

15 <sup>3</sup>School of Future Technology, University of Chinese Academy of Sciences, Bei-  
16 jing 101408, China.

17 <sup>4</sup>BGI Education Center, University of Chinese Academy of Sciences, Shenzhen, 518083,  
18 China.

19 <sup>5</sup>MGI, BGI-Shenzhen, Shenzhen, 518083, China.

20 <sup>6</sup>BGI PathoGenesis Pharmaceutical Technology, Shenzhen, China.

21 <sup>7</sup>Shenzhen Key Laboratory of Unknown Pathogen Identification, BGI-Shenzhen, Shen-  
22 zhen, 518083, China.

23 <sup>8</sup>Institute of Infectious disease, Guangzhou Eighth People's Hospital of Guangzhou Medi-  
24 cal University, Guangzhou, China.

25 <sup>9</sup>James D. Watson Institute of Genome Science, Hangzhou, 310008, China.

26 <sup>10</sup>Guangdong Provincial Key Laboratory of Genome Read and Write, BGI-Shenzhen,  
27 Shenzhen, 518120, China.

28 <sup>11</sup>Shenzhen Engineering Laboratory for Innovative Molecular Diagnostics, BGI-Shenzhen,  
29 Shenzhen, 518120, China.

30 <sup>12</sup>School of Biology and Biological Engineering, South China University of Technology,  
31 Guangzhou, China

32

33 Correspondence should be addressed to J.L. (lijunhua@genomics.cn), Y.L. (dry-  
34 iminli@vip.163.com), W.C. (chenwj@genomics.com), and Y.Z. (zhangyanyan@ge-  
35 nomics.cn).

36 \*These authors contributed equally to this work.

37 #These authors jointly supervised this work.

## 38 **ABSTRACT**

39 **COVID-19 has caused a major epidemic worldwide, however, much is yet to be known**  
40 **about the epidemiology and evolution of the virus. One reason is that the challenges**  
41 **underneath sequencing HCoV-19 directly from clinical samples have not been com-**  
42 **pletely tackled. Here we illustrate the application of amplicon and hybrid capture (cap-**  
43 **ture)-based sequencing, as well as ultra-high-throughput metatranscriptomic (meta)**  
44 **sequencing in retrieving complete genomes, inter-individual and intra-individual var-**  
45 **iations of HCoV-19 from clinical samples covering a range of sample types and viral**  
46 **load. We also examine and compare the bias, sensitivity, accuracy, and other char-**  
47 **acteristics of these approaches in a comprehensive manner. This is, to date, the first**  
48 **work systematically implements amplicon and capture approaches in sequencing**  
49 **HCoV-19, as well as the first comparative study across methods. Our work offers**  
50 **practical solutions for genome sequencing and analyses of HCoV-19 and other**  
51 **emerging viruses.**

52

## 53 **INTRODUCTION**

54 As of 14 March 2020, human coronavirus 2019 (HCoV-19) has surpassed severe acute  
55 respiratory syndrome coronavirus (SARS-CoV) and Middle East respiratory syndrome coro-  
56 navirus (MERS-CoV) in every aspect, infecting over 140,000 people in more than 110 coun-  
57 tries, with a mortality of over 5,000<sup>1,2</sup>. So far, coronaviruses have caused three major  
58 epidemics in the past two decades, posing a great challenge to global health and economy.  
59 Massively parallel sequencing (MPS) of viral genomes has demonstrated enormous capac-  
60 ity as a powerful tool to study emerging infectious diseases, such as SARS, MERS, Zika,  
61 and Ebola, in tracing the outbreak origin and drivers, tracking transmission chains, mapping  
62 the spread, and monitoring the evolution of the etiological agents<sup>3-8</sup>. Though by 14 March  
63 2020, fewer than 500 HCoV-19 genomes were published on public databases including  
64 China National GeneBank DataBase (CNGBdb), NCBI GenBank, the Global initiative on  
65 sharing all influenza data (GISAID), etc, and much remains unknown about the epidemiol-  
66 ogy and evolution of the virus. One possible explanation of the paucity of published HCoV-

67 19 genomes was the challenges posed by sequencing clinical samples with low virus abun-  
68 dance.

69 The first teams obtained the HCoV-19 genome sequences through metatranscriptomic  
70 MPS, supplemented by PCR and Sanger sequencing of a combination of bronchoalveolar-  
71 lavage fluid (BALF) and culture<sup>9-11</sup> or from BALF directly<sup>12,13</sup>. Experience from studying  
72 SARS-CoV showed that BALF from the lower respiratory tract was an ideal sample type with  
73 higher viral load<sup>14</sup>. However, BALF was not routinely collected from every patient, and hu-  
74 man airway epithelial (HAE) cell culture is very labor-intensive and time-consuming, taking  
75 four to six weeks<sup>10,15</sup>. The University of Hong Kong team managed to get the whole-genome  
76 sequences through metatranscriptomic sequencing with Oxford Nanopore platform supple-  
77 mented by Sanger sequencing from both nasopharyngeal and sputum specimens after sin-  
78 gle-primer amplification<sup>16</sup>. The United States scientists published the whole-genome se-  
79 quence using oropharyngeal and nasopharyngeal specimens through Sanger and meta-  
80 transcriptomic sequencing with both Illumina and MinIon<sup>17</sup>. To date, multiplex PCR-based  
81 or hybrid capture-based whole-genome sequencing of HCoV-19, as well as comparative  
82 studies between different approaches, have not been reported on peer-reviewed journals.

83 Besides inter-individual variations, dissecting intra-individual dynamics of viruses also  
84 largely promotes our understanding of viral-host interactions, viral evolution and transmis-  
85 sion as demonstrated for Ebola, Zika, Influenza, etc<sup>6,18-20</sup>. The analyses of intra-individual  
86 single nucleotide variations (iSNVs) and its allele frequency have also contributed to anti-  
87 viral therapy and drug resistance, e.g., to reveal highly conserved genes during the outbreak  
88 that potentially serve as ideal therapeutic targets<sup>19,21</sup>. However, it is a challenge to accurately  
89 detect iSNVs from clinical samples, especially when the samples are subjected to extra  
90 steps of enrichment and amplification.

91 Therefore, we aim to comprehensively compare the sensitivity, inter-individual (variant) and  
92 intra-individual (iSNV) accuracy, and other general features of different approaches by sys-  
93 tematically utilizing ultra-high-throughput metatranscriptomic, hybrid capture-based, and  
94 amplicon-based sequencing approaches to obtain genomic information of HCoV-19 from  
95 serial dilutions of a cultured isolate and directly from clinical samples. We present a reason-  
96 able sequencing strategy that fits into different scenarios, and estimate the minimal amount  
97 of sequencing data necessary for downstream HCoV-19 genome analyses. Our study, to-  
98 gether with our tailor-made experimental workflows and bioinformatics pipelines, offers very

99 practical solutions to facilitate the studies of HCoV-19 and other emerging viruses in the  
100 future and would promote extensive genomic sequencing and analyses of HCoV-19 and  
101 other emerging viruses, underpinning more comprehensive real-time virus surveillance and  
102 more efficient viral outbreaks managing.

## 103 **RESULTS**

104 **Design of the comparative study.** We sampled eight specimens from COVID-19 patients  
105 in February 2020, including throat swab, nasal swab, anal swab and sputum specimens,  
106 and the corresponding cycle threshold (Ct) value of HCoV-19 qRT-PCR ranges from 18 to  
107 32 (Table 1). We initially tried to boost the coverage and depth of the viral genome by ultra-  
108 deep metatranscriptomic sequencing with an average sequencing amount of 1,607,264,105  
109 paired-end reads (Table 1). Although we managed to obtain complete viral genome assem-  
110 blies for each specimen, the sequencing depth varied across specimens. Only 0.002%-  
111 0.003% of the total reads were assigned to the HCoV-19 in three samples (GZMU0014,  
112 GZMU0030 and GZMU0031) with Ct between 29-32, resulting in inferior sequencing depth  
113 (less than 100X) (Table 1). Isolating viruses and enriching them in cell culture might improve  
114 the situation, but this requires high-standard laboratory settings and expertise apart from  
115 being time-consuming. Also, unwanted mutations that are not concordant with original clin-  
116 ical samples may be introduced during the culturing process.

117 To enrich adequate viral content for whole-genome sequencing in a convenient manner, we  
118 pursued two other methods: multiplex PCR amplification (amplicon) and hybrid capture  
119 (capture) (Fig. 1). We designed a systematic study to comprehensively validate the bias,  
120 sensitivity, inter-individual (variant) and intra-individual (iSNV) accuracy of multiple ap-  
121 proaches by sequencing serial dilutions of a cultured isolate (unpublished), as well as the  
122 eight clinical samples (Fig. 2). We performed qRT-PCR of 10-fold serial dilutions (D1-D7) of  
123 the cultured isolate, and the Ct was 17.3, 20.8, 24.5 for, 28.7, 31.8, 35, and 39.9, respec-  
124 tively, indicating the undiluted RNA (D0) of the cultured isolate contained  $\sim 1E+08$  genome  
125 copies per mL. For amplicon sequencing, we utilized two kits comprising of two set of pri-  
126 mers generating PCR products of 300-400 bp and 100-200 bp, respectively. The  $\sim 400$  bp  
127 amplicon-based sequencing was implemented in all samples and analyzed throughout the  
128 study, while the  $\sim 200$  bp amplicon-based sequencing was only applied in the cultured isolate  
129 for coverage analysis.

130 **Comparison of evenness and sensitivity.** Theoretically, amplicon sequencing should be  
131 the most sensitive and economical method among the three, and is particularly suitable in  
132 an outbreak where viral isolates are highly related. Although, there are still potential pitfalls,  
133 for instance, the 40 cycle-PCR in our workflow might augment trace amounts of HCoV-19  
134 cross-contamination. To ensure the confidence of the datasets, we included serial dilutions  
135 of the cultured isolate and negative controls prepared from nuclease-free water and human  
136 nucleic acids since the 1st PCR. All samples in  $\sim 400$  bp amplicon-based sequencing exhib-  
137 ited  $> 99.5\%$  coverage across the HCoV-19 genome except for 1E+01 (95.23%),  
138 GZMU0031 (73.65%), HNA (6.17%), water (60.24%), suggesting the primers were well de-  
139 signed and the positive datasets were reliable. We also set stringent and method-specific  
140 criteria to filter low-confidence sequencing reads and samples (see Methods), e.g., clinical  
141 sample GZMU0031 was excluded for downstream sensitivity and accuracy validation due  
142 to inadequate depth in amplicon sequencing (Fig. 3a). Another pitfall is that amplification  
143 across the genome can hardly be unbiased, causing difficulties in complete genome assem-  
144 bly. Indeed, amplicon sequencing exhibited a higher level of bias compared with meta-  
145 transcriptomic sequencing, in terms of coverage across the viral genomes from the cultural  
146 isolate and the clinical samples tested in our study (Fig. 3b, d, Supplementary Fig. 1). To  
147 our surprise, however, capture sequencing was almost as unbiased as meta sequencing,  
148 demonstrating better performance than the previous capture method used to enrich ZIKV  
149 despite the HCoV-19 genome is  $\sim 3$  fold larger than ZIKV<sup>22</sup> (Fig. 3b, c). Two reasons  
150 amongst others were likely to be accountable to this improvement, 1) we utilized 506 pieces  
151 of 120 ssDNA probes covering 2x of the HCoV-19 genome to capture the libraries, 2) we  
152 employed the DNBSEQ sequencing technology that features PCR-free rolling circle replica-  
153 tion (RCR) of DNA Nanoballs (DNBs)<sup>23,24</sup>.

154 The sequencing results of amplicon and capture approaches revealed dramatic increases  
155 in the ratio of HCoV-19 reads out of the total reads compared with meta sequencing, sug-  
156 gesting the enrichment was highly efficient - 5596-fold in capture method and 5710-fold in  
157 amplicon method for each sample on average (Supplementary Table 1-2). To further com-  
158 pare the sensitivity of different methods, we plotted the number of HCoV-19 reads per million  
159 (HCoV-19-RPM) of total sequencing reads against the viral concentration for each sample.  
160 The productivity was similar between the two methods when the input RNA of the cultured  
161 isolate contained  $1E+05$  genome copies per mL and above (Fig. 3e). However, amplicon  
162 sequencing produced 10-100 fold more HCoV-19 reads than capture sequencing when the

163 input RNA concentration of the cultured isolate was  $1E+04$  genome copies per mL and  
164 lower, suggesting amplicon-based enrichment was more efficient than capture for more  
165 challenging samples (conc.  $\leq 1E+04$  genome copies per mL, or Ct  $\geq 28.7$ ) (Fig. 3e). Meta  
166 sequencing - as expected - produced dramatically lower HCoV-19-RPM than the other two  
167 methods among clinical samples tested with a wide range of Ct values, whereas amplicon  
168 and capture were generally comparable to each other (Fig. 3e). Considering the costs for  
169 sequencing, storage, and analysis increase substantially with larger datasets, we tried to  
170 estimate how much sequencing data must be produced for each approach in order to  
171 achieve 10X depth across 95% of the HCoV-19 genome, and the results can be found in  
172 Supplementary Table 3. As a practical, cost-effective guidance for future sequencing, we  
173 also assessed the minimum amount of data required to pass the stringent filters ( $\geq 95\%$   
174 coverage and method-specific depth, see Methods) in our pipelines corresponding to differ-  
175 ent viral loads. We estimated that for high-confidence downstream analyses, amplicon se-  
176 quencing requires at least 2,757 to 186 Mega bases (Mb) for samples containing  $1E+02$  to  
177  $1E+06$  copies of HCoV-19 genome per mL, while capture sequencing requires 24,474 to 9  
178 Mb for the same situation (Fig. 3g, Supplementary Table 4).

179 **Investigation of inter- and intra-individual variations.** To determine the accuracy of dif-  
180 ferent approaches in discovering inter-individual genetic diversity, we tested each method  
181 in calling the single nucleotide variations (SNVs) and verified some of the SNVs with Sanger  
182 sequencing (Supplementary Fig. 2). Two to five SNVs were identified within each clinical  
183 sample, and in all the seven samples, SNVs identified by the three methods were concord-  
184 ant except that capture missed one SNV at position 16535 in GZMU0014 (Fig. 4a). We then  
185 investigated the allele frequencies of these sites across methods, and found that alleles  
186 identified by capture sequencing displayed lower frequencies than the other two methods,  
187 especially for GZMU0014, GZMU0030, and GZMU0042 where the viral load was lower (Ct  
188  $\geq 29$ ), which explained why capture sequencing neglected an SNV in our pipeline when the  
189 cutoff of SNV calling was set as 80% allele frequency (Fig. 4b). These data indicate that  
190 amplicon sequencing is more accurate than capture sequencing in identifying SNVs, espe-  
191 cially for challenging samples.

192 To further determine the accuracy of different approaches in identifying HCoV-19 iSNVs, we  
193 examined minor allele frequencies in serial dilutions of the cultured HCoV-19 isolate and

194 clinical samples. For serial dilutions of the cultured isolate, the minor allele frequencies de-  
195 tected in capture sequencing datasets were generally approximate to meta sequencing,  
196 while most allele frequencies in amplicon sequencing datasets deviated with those in meta  
197 sequencing (Fig. 4c) A similar pattern was shown for clinical samples, indicating that amp-  
198 plicon sequencing was unreliable of quantifying minor allele frequencies (Fig. 4d). Plotting  
199 allele frequencies against HCoV-19 concentrations supported the above finding, and further  
200 revealed that amplicon sequencing was unreliable of allele frequencies at all concentrations  
201 while capture sequencing was reliable at  $> 1E+03$  genome copies per mL (Supplementary  
202 Fig. 3). Referring to the iSNV identified in clinical samples by meta sequencing, we then  
203 calculated the false positive rate (FPR) and false negative rate (FNR) of minor alleles called  
204 by amplicon and capture methods. The FPR and FNR of minor alleles identified in amplicon  
205 sequencing was 0.74% and 66.67%, while that in capture sequencing was 0.02% and 0%,  
206 respectively. Together these results suggest amplicon sequencing was not as accurate as  
207 capture sequencing in identifying minor alleles, which could be in part due to Matthew effect  
208 caused by PCR.

209 **Microbiome in clinical samples.** In addition to target viral genome, metatranscriptomic  
210 sequencing has also allowed us to investigate RNA expression patterns of the overall mi-  
211 crobiome and host content and thus suitable for discovering new viruses, distinguishing co-  
212 infections, and dissecting virus-host interactions. To explore the microbiota, we performed  
213 further metatranscriptomics analysis of the clinical samples. We were able to identify host  
214 nucleic acids in all of the samples, and over 95% of total reads were from the host in sputum,  
215 nasal, and throat samples (Supplementary Fig. 4a). Virus contributed to less than 5% of  
216 reads in anal swab and throat swab while more than 50% of reads in nasal swab (Supple-  
217 mentary Fig. 4b). These results suggest nasal swab could be the most ideal sample type for  
218 viral detection among the four sample types, which agrees with recent clinical evidence<sup>25</sup>.  
219 Among the viral reads, over 90% were Coronaviridae, which is consistent with clinical diag-  
220 nostics (Supplementary Fig. 4c). Reads from other viruses were also identified, indicating  
221 further measurements could be taken to confirm if co-infection exists (Supplementary Fig.  
222 4). Bacterial composition was also shown, providing support for scientific research, as well  
223 as for further confirmation of bacterial infection and antibiotics prescription (Supplementary  
224 Fig. 4d-f).

225 **Guidance for virus sequencing.** Taken together, each sequencing scheme elaborated  
226 here for massively parallel sequencing of HCoV-19 genomes has its own merits (Table 2).  
227 We hereby propose a reasonable, cost-effective strategy for sequencing and analyzing  
228 HCoV-19 under different situations: 1) if one wants to study other genetic materials than the  
229 target viruses, or the viruses become highly diversified via recombinational events, or the  
230 viral load within the RNA sample is high (e.g. conc.  $\geq 1E+05$  viral genome copies per mL, or  
231  $Ct \leq 24.5$ ), meta sequencing can be prioritized; 2) if one focuses on intra-individual variations  
232 for more challenging samples (e.g. conc.  $< 1E+05$  viral genome copies per mL, or  $Ct > 24.5$ ),  
233 capture sequencing seems to be a justified choice; and, 3) if identifying SNVs is the main  
234 purpose, the most convenient, economical strategy would be amplicon sequencing that can  
235 support high-confidence analyses of samples containing viral content as low as  $1E+02$  viral  
236 genome copies per mL, or  $Ct$  as high as 35.

## 237 **DISCUSSION**

238 Sequencing low-titre viruses directly from clinical samples is challenging, which is further  
239 exacerbated by the fact that coronavirus genomes are the largest among RNA viruses ( $\sim 3$   
240 fold larger compared with ZIKV). Compared with direct metatranscriptomic sequencing, high  
241 sensitivity of hybrid capture and amplicon sequencing methods come at a price of low ac-  
242 curacy, and neither of the two can be used to sequence highly diverse or recombinant vi-  
243 ruses because the primers and probes are specific to known viral genomes. Amplicon se-  
244 quencing compromises its accuracy, while it becomes the most convenient and economical  
245 method of all. Either or a combination of the approaches described here can be chosen to  
246 cope with various needs of researchers, e.g., metatranscriptomic sequencing data with in-  
247 sufficient coverage and depth can be pooled with hybrid capture data to generate high qual-  
248 ity assemblies<sup>22</sup>. Our research, as well as the methods elaborated here, are able to help  
249 other researchers to sequence and analyze large viruses from clinical samples and thus  
250 benefit investigations on the genomic epidemiology of viruses.

251 Some pros and cons described above might be specific to the experimental workflows and  
252 bioinformatics pipelines tailored in this study, e.g., 1) the bias of amplicon sequencing can  
253 be improved by reducing the amount of cycles in the 1st PCR or optimize the molar ratios  
254 of primers (Fig. 1a), 2) the amplicon sequencing is particularly convenient compared with  
255 previous counterparts since the fragmentation and library construction steps are omitted



256 here by integrating adaptor and barcode ligation in the 2nd PCR and sequencing the ampli-  
257 cons using single-end 400 nt reads (Fig. 1a), 3) using anything less than 506 pieces of 120  
258 ssDNA probes in hybrid capture may attenuate the sequencing coverage while increase the  
259 bias, 4) metatranscriptomic sequencing was conducted with an ultra-high-throughput se-  
260 quencing platform so that the successful rate was substantially higher than usual. 5) the  
261 minimal amount of data necessary for analyzing the HCoV-19 genome from clinical samples  
262 across methods is higher than that predicted by data from the cultured isolate was probably  
263 due to the high nucleic acids background from the host and other microbes (Supplementary  
264 Table 3-4, Supplementary Fig. 4). Also, we do not take into account the time spent in se-  
265 quencing since the workflows can be easily adapted in order to be compatible with various  
266 platforms including Illumina and Oxford Nanopore Technologies (ONT), besides DNBSEQ  
267 of MGI.

## 268 **METHODS**

### 269 **Ethics statement**

270 The Institutional Review Boards (IRB) of the First Affiliated Hospital of Guangzhou Medical  
271 University approved the clinical studies. IRB of BGI-Shenzhen approved the sequencing  
272 and downstream studies.

### 273 **Sampling, RNA extraction, reverse transcription and qRT-PCR**

274 Clinical specimens (including throat swab, nasal swab, anal swab, and sputum) were ob-  
275 tained from confirmed COVID-19 cases at the First Affiliated Hospital of Guangzhou Medical  
276 University. Total RNA of the cultured isolate of HCoV-19 was obtained from the Academy of  
277 Military Medical Science (AMMS), and subjected to 10-fold serial dilutions. Total RNA was  
278 extracted with QiAamp RNeasy Mini Kit (Qiagen, Heiden, Germany) following the manufac-  
279 turer's instructions without modification. Real-time reverse transcription PCR (qRT-PCR)  
280 targeting RdRp gene and N gene of HCoV-19 was used to detect and quantify the viral RNA  
281 within clinical samples and serial dilutions of the cultured isolate using the HCoV-19 Nucleic  
282 Acid Detection Kit following the manufacture's protocol (Geneodx, Shanghai, China, and  
283 BGI-Shenzhen, Shenzhen, China).

284

## 285 **Metatranscriptomic library preparation and sequencing**

286 Host DNA was removed from RNA samples using DNase I , and the concentration of RNA  
287 samples was measured by Qubit RNA HS Assay Kit (Thermo Fisher Scientific, Waltham,  
288 MA, USA). DNA-depleted and purified RNA was used to construct the single-stranded cir-  
289 cular DNA library with MGIEasy RNA Library preparation reagent set (MGI, Shenzhen,  
290 China), as follows: 1) RNA was fragmented by incubating with fragmentation buffer at 87°C  
291 for 6 min; 2) double-stranded (ds) cDNA was synthesized using random hexamers with frag-  
292 mented RNA; 3) ds cDNA was subjected to end repair, adaptor ligation, and 18-cycle PCR  
293 amplification; 4) PCR products were Unique Dual Indexed (UDI), before going through cir-  
294 cularization, and rolling circle replication (RCR) to generate DNA nanoballs (DNBs)-based  
295 libraries. DNBs preps of clinical samples were sequenced on the ultra-high-throughput DNB-  
296 SEQ-T7 platform (MGI, Shenzhen, China) with paired-end 100 nt strategy, generating 321  
297 Gb sequencing data for each sample on average.

## 298 **Hybrid capture-based enrichment and sequencing**

299 A hybrid capture technique was used to enrich HCoV-19-specific content from the meta-  
300 transcriptomic double-stranded DNA libraries with the 2019-nCoVirus DNA/RNA Capture  
301 Panel (BOKE, Jiangsu, China). Manufacturer's instructions were slightly modified to ac-  
302 commodate the MGISEQ-2000 platform, i.e., blocker oligos and PCR primer oligos were  
303 replaced by MGIEasy exon capture assistive kit (MGI, Shenzhen, China). DNBs-based li-  
304 braries were constructed and sequenced on the MGISEQ-2000 platform with paired-end  
305 100 nt strategy using the same protocol described above, generating 37 Gb sequencing  
306 data for each sample on average.

## 307 **Amplicon-based enrichment and sequencing**

308 Total RNA was reverse transcribed to synthesize the first-strand cDNA with random  
309 hexamers and Superscript II reverse transcriptase kit (Invitrogen, Carlsbad, USA).  
310 Sequencing was attempted on all samples regardless of Ct value including negative controls  
311 prepared from nuclease-free water and NA12878 human gDNA. A two-step HCoV-19  
312 genome amplification was performed with an equimolar mixture of primers using ATOplex  
313 SARS-CoV-2 Full Length Genome Panel following the manufacture's protocol (MGI, Shen-  
314 zhen, China), generating 137X ~400 bp amplicons or 299X ~200 bp amplicons and the ge-  
315 nome positions of the amplicons are shown in Supplementary Table 5. 20 µl of first-strand

316 cDNA was mixed with the components of the first PCR reaction following the manufacturer's  
317 instructions, including lambda phage gDNA unless specified. 2 ng of Human gDNA was  
318 added to each PCR reaction of the cultured isolate. The PCR was performed as follows: 5  
319 min at 37°C, 10 min at 95°C, 15 cycles of (10 s at 95°C, 1 min at 64°C, 1 min at 60°C to 10 s  
320 at 72°C), 2 min at 72°C. The products were purified with MGI EasyDNA Clean beads (MGI,  
321 BGI-Shenzhen, China) at a 5:4 ratio and cleaned with 80% concentration ethanol according  
322 to the manufacturer's instructions. The 2nd PCR was performed under the same regimen  
323 as the 1st PCR except for 25 cycles, and the beads-purified products from the first PCR  
324 reaction were unique dual indexed. After the 2nd PCR, products were purified following the  
325 same procedures as the 1st PCR and quantified using the Qubit dsDNA High Sensitivity  
326 assay on Qubit 3.0 (Life Technologies). PCR products of samples yielding sufficient material  
327 (> 5 ng/ $\mu$ l) were pooled at equimolar to a total DNA amount of 300 ng before converting to  
328 single-stranded circular DNA. DNBS-based libraries were generated from 20  $\mu$ l of single-  
329 stranded circular DNA pools and sequenced on the MGISEQ-2000 platform with single-end  
330 400 nt strategy, generating 1.8 Gb sequencing data for each sample on average.

### 331 **Identification of HCoV-19-like reads from Massively Parallel Sequencing data**

332 For metatranscriptomic and hybrid capture sequencing data, total reads were first processed  
333 by Kraken v0.10.5<sup>26</sup> (default parameters) with a self-build database of Coronaviridae ge-  
334 nomes (including SARS, MERS and HCoV-19 genome sequences downloaded from  
335 GISAID, NCBI and CNGB) to efficiently identify candidate viral reads with a loose manner.  
336 These candidate reads were further qualified with fastp v0.19.5<sup>27</sup> (parameters: -q 20 -u 20 -  
337 n 1 -l 50) and SOAPnuke v1.5.6<sup>28</sup> (parameters: -l 20 -q 0.2 -E 50 -n 0.02 -5 0 -Q 2 -G -d) to  
338 remove low-quality reads, duplications and adaptor contaminations. Low-complexity reads  
339 were next filtered by PRINSEQ v0.20.4<sup>29</sup> (parameters: -lc\_method dust -lc\_threshold 7).  
340 After the above process, HCoV-19-like reads generated from metatranscriptomics and  
341 hybrid capture method were obtained.

342 For amplicon sequencing data, SE 400 reads were first processed with fastp v0.19.5<sup>27</sup> (pa-  
343 rameters: -q 20 -u 20 -n 1 -l 50) to remove low quality-reads and adaptor sequences. Primer  
344 sequences and the 21 nt upstream and downstream of primers within the reads were then  
345 trimmed with BAMClipper v1.1.1<sup>30</sup> (Parameters: -n 4 -u 21 -d 21). Reads with low quality  
346 bases, adaptors, primers and adjacent sequences completely removed as described above  
347 were considered as clean reads for downstream analyses.

## 348 **Assembling viral genome**

349 HCoV-19-like reads of metatranscriptomic and hybrid capture sequencing data were *de*  
350 *novo* assembled with SPAdes (v3.14.0)<sup>31</sup> using the default settings to obtain virus genome  
351 sequences. To reduce the complexity of the assembling process, identified HCoV-19-like  
352 reads of metatranscriptomic and hybrid capture sequencing data were subsampled to the  
353 data amount greater than 100X sequencing depth for the HCoV-19 genome. For the two  
354 metatranscriptomic samples with a sequencing depth lower than 100X for the HCoV-19  
355 genome (GZMU0014 and GZMU0030), all HCoV-19-like reads were used for assembling  
356 viral genomes.

357 Due to the uneven read coverage in amplicon sequencing of HCoV-19, virus consensus  
358 sequences of amplicon samples were generated by Pilon v1.23<sup>32</sup> (parameters: --changes --  
359 vcf --changes --vcf --mindepth 1 --fix all, amb). Positions with depth less than 100X or lower  
360 five times than negative control samples were masked as ambiguous base N.

## 361 **Assessment the coverage depth across the viral genome**

362 HCoV-19-like reads of metatranscriptomic and hybrid capture sequencing data were aligned  
363 to the HCoV-19 reference genome (GISAID accession: EPI\_ISL\_402119) with BWA aln  
364 (v0.7.16)<sup>33</sup>. Duplications were identified by Picard Markduplicates  
365 (v2.10.10)( <http://broadinstitute.github.io/picard>) with default settings. For each sample, we  
366 calculated the depth of coverage at each nucleotide position of the HCoV-19 reference  
367 genome with Samtools (v1.9)<sup>34</sup> and scaled the values to the mean depth. For each  
368 nucleotide position, we calculated the median depth, and 20th and 80th percentiles across  
369 all samples. Read coverage and depth across the HCoV-19 reference genome were plotted  
370 by a 200-nt sliding window with the ggplot2<sup>35</sup> package in R (v3.6.1)<sup>36</sup>.

371 Amplicon sequencing data were processed as described above, except that duplications  
372 were not removed. A heatmap was generated to visualize the viral genome coverage for all  
373 samples sequenced by the amplicon method with the pheatmap<sup>37</sup> package in R (v3.6.1)<sup>36</sup>.  
374 The depth at each nucleotide position was binarized, and was shown in pink if the depth  
375 was 100x and above.

376

## 377 **Relationships between genome copies and method-dependent minimum amount of** 378 **sequencing data**

379 HCoV-19 reads of metatranscriptomic and hybrid capture sequencing data were identified  
380 by aligning the HCoV-19-like reads to the HCoV-19 reference genome (GISAID accession:  
381 EPI\_ISL\_402119) with BWA in a strict manner of coverage  $\geq 95\%$  and identity  $\geq 90\%$ . For  
382 comparisons of the coverage and depth of the viral genome across samples and methods,  
383 we normalized the viral reads to total sequencing reads with HCoV-19 Reads Per Million  
384 (HCoV-19-RPM). HCoV-19-RPM for amplicon sequencing data was calculated by the same  
385 pipelines we applied for metatranscriptomic and hybrid capture sequencing data.

386 To estimate the minimum data requirements for genome assembling and intra-individual  
387 variation analysis, we applied gradient-based sampling to the HCoV-19 genome align-  
388 ments (referred to BAM files) to each dataset using Samtools (v1.9)<sup>34</sup>. The effective genome  
389 coverage was set as 95% for all three MPS methods. Considering the distinct  
390 technologies used in different methods, we set method-dependent thresholds of effective  
391 depth as follows: 1)  $\geq 10X$  for metatranscriptomic sequencing; 2)  $\geq 20X$  for hybrid capture  
392 sequencing; and 3)  $\geq 100X$  for amplicon sequencing. We next calculated the coverage and  
393 depth within each subsampled BAM file per sample to determine the minimal BAM file that  
394 could meet the above thresholds of both coverage and sequencing depth. The method-  
395 dependent minimum amount of sequencing data of each sample were estimated accord-  
396 ingly. We assessed the correlations between the HCoV-19 genome copies per mL in diluted  
397 samples of cultured isolates and the minimum amount of sequencing data for amplicon-  
398 and capture-based methods using Pearson correlation coefficient (R) with the function  
399 *scatter* from the R package *ggpubr* (v3.6.1)<sup>38</sup>.

## 400 **Consistency in variants calling performance among methods**

401 Except for amplicon sequencing samples, variants calling in metatranscriptomic and hybrid  
402 capture sequencing samples was performed in the previous BAM files of identified HCoV-  
403 19 reads after removing duplications from alignment output by Picard Markduplicates  
404 (<http://broadinstitute.github.io/picard>). To accurately identify SNVs from viral sequencing  
405 data of all three methods, we first called SNVs with freebayes (v1.3.1)<sup>39</sup> (parameters: -p 1 -  
406 q 20 -m 60 --min-coverage 10 -V) and then filtered the low-confidence SNVs with snippy-  
407 vcf\_filter<sup>40</sup> (parameters: --minqual 100 --mincov 10 --minfrac 0.8). Remaining SNVs post

408 filtering in VCF files generated by freebayes were annotated in HCoV-19 genome assem-  
409 blies and consensus sequences with SNVeff (v4.3)<sup>41</sup> using default parameters.

410 Next, we calculated SNV allele frequencies and called iSNVs (intra-host Single Nucleotide  
411 Variations) for each dataset to assess the consistency of variants calling performance  
412 among three methods. We performed pysamstats v1.1.2 ([https://github.com/ali-  
413 manfoo/pysamstats](https://github.com/ali-manfoo/pysamstats)) (parameters: -type variation\_strand --min-baseq 20 -D 1000000) to  
414 count the number of matches, mismatches, deletions and insertions at each base, estimate  
415 nucleotide percentage and determine allele frequencies of SNVs at reference genome po-  
416 sitions based on the HCoV-19 alignments from BAM files.

417 For amplicon sequencing data, only base positions covered by  $\geq 100X$  reads were used for  
418 iSNVs calling. For metatranscriptomic and hybrid capture-based sequencing data, the  
419 thresholds of depth were set as 10X and 20X, respectively. The candidate iSNVs were fur-  
420 ther filtered for quality as follows: 1) frequency filtering, only minor alleles (frequency  $\geq 5\%$   
421 and  $< 50\%$ ) and major alleles (frequency  $\geq 50\%$  and  $\leq 95\%$ ) were remained; 2) depth filter-  
422 ing, iSNVs with fewer than five forward or reverse reads were removed; and 3) strand bias  
423 filtering (not applicable to single-end reads of amplicon sequencing), iSNVs were removed  
424 if there were more than a 10-fold strand bias or a 5-fold difference between the strand bias  
425 of the variant call and that of the reference call.

## 426 **Taxonomy of clinical samples by unbiased metatranscriptomic sequencing**

427 For metatranscriptomic sequencing of clinical samples, raw sequencing data of a single se-  
428 quence lane (approximately 60-75 Gb per sample) was used to simultaneously assess the  
429 RNA expression patterns of human, bacteria and viruses in clinical samples from COVID-  
430 19 patients. We first used software fastp (v0.19.5)<sup>27</sup> to filter low-quality reads and remove  
431 adapter with parameters: -5 -3 -q 20 -c -l 30. After QC, we mapped high-quality reads to  
432 hg19 and removed human ribosomal RNA (rRNA) reads by SOAP2 v2.21<sup>42</sup> (parameters: -  
433 m 0 -x 1000 -s 28 -l 32 -v 5 -r 1), and the remaining RNA reads were then aligned to hg19  
434 by HISAT2<sup>43</sup> with default settings to identify non-rRNA human transcripts as previously de-  
435 scribed. Next, we applied Kraken 2<sup>44</sup> (version 2.0.8-beta, parameters: --threads 24 --confi-  
436 dence 0) to assign microbial taxonomic ranks to non-human RNA reads against the large  
437 reference database MiniKraken2 (April 2019, 8GB) built from the Refseq bacteria, archaea,

438 and viral libraries and the h38 human genome. Bracken<sup>45</sup> (Bayesian Reestimation of Abun-  
439 dance with Kraken) was further applied to estimate microbial relative abundances based on  
440 taxonomic ranks of reads assigned by Kraken2.

441

#### 442 **Data availability**

443 Sequencing data that support the findings of this study have been deposited in CNGB  
444 (<https://db.cngb.org/>) under Project accession CNP0000951 and CNP0000955, and in  
445 GISAID under accession EPI\_ISL\_414663, EPI\_ISL\_414686 to EPI\_ISL\_414692.

446

#### 447 **Code availability**

448 The software and parameters used in data analysis can be found in Supplementary Table  
449 6.

450

## 451 **ACKNOWLEDGEMENTS**

452 We attribute this work to the amazing people in this land who dedicate themselves to the  
453 battle of mankind against viruses. This work is funded by the State Key Research Develop-  
454 ment Program of China (2019YFC1200501), the National Major Project for Control and Pre-  
455 vention of Infectious Disease in China (2018ZX10301101-004), the emergency grants for  
456 prevention and control of SARS-CoV-2 of Ministry of Science and Technology  
457 (2020YFC0841400) and Guangdong province, China (2020B111107001,  
458 2020B111108001, 2018B020207013), Guangdong Provincial Key Laboratory of Genome  
459 Read and Write (No. 2017B030301011), Guangdong Provincial Academician Workstation  
460 of BGI Synthetic Genomics (No. 2017B090904014), and Shenzhen Engineering Laboratory  
461 for Innovative Molecular Diagnostics (DRC-SZ[2016]884). We thank China National Gene-  
462 Bank at Shenzhen for providing sequencing service. We appreciate all the authors who have  
463 deposited and shared genome data on GISAID, and a table with genome sequence ac-  
464 knowledgments can be found in Supplementary Table 7.

## 465 **AUTHOR CONTRIBUTIONS**

466 J.L., W.C. and M.X. conceived the project. X.L., J.Z, Y.W., and Y.L. sampled and processed  
467 the clinical specimen. M.X., Ji.L., M.L., and J.L. designed the experiments. L.Y. and Y.Z.  
468 developed the multiplex PCR amplicon-based sequencing method. M.L., Ji.L., Y.L, P.R.  
469 W.S., G.Y. and T.C. performed multiplex PCR and amplicon sequencing. J.L., and P.R.  
470 performed metatranscriptomic library construction and hybrid capture experiments. J.J.,  
471 M.L, W.S., T.L., H.R., and H.Z. processed the sequencing data and conducted bioinformatic  
472 analyses. J.L., M.X. H.Z., J.J., M.L., and W.S. interpreted the data. M.X., J.J., M.L., and J.L.  
473 wrote and polished the manuscript. H.Z., W.S., L.Y., W.C. and Y.Z. contributed substantially  
474 to the manuscript revisions. All other authors provided useful suggestions and comments  
475 on the project and the manuscript.

476



477 **COMPETING INTERESTS**

478 ATOplex SARS-CoV-2 Full Length Genome Panel is a proprietary product.

479 PCR PRIMER PAIR AND APPLICATION THEREOF

480 Patent applicant: MGI Tech Co.,Ltd

481 Name of inventor(s): Lin Yang, Ya Gao, Guodong Huang, Yicong Wang, Yuqian wang,

482 Yanyan Zhang, Fang Chen, Na Zhong, Hui Jiang, Xun Xu.

483 Application number: PCT/CN2017/089195

484 Any inquires or requests regarding this product should be specifically addressed to Yan-

485 yan Zhang (zhangyanyan@genomics.cn).

486

## 487 References

- 488 1 Jiang, S. *et al.* A distinct name is needed for the new coronavirus. *The Lancet* (2020).
- 489 2 Organization, W. H. in Available from: [https://www.who.int/emergencies/diseases/novel-](https://www.who.int/emergencies/diseases/novel-coronavirus-2019/situation-reports/)
- 490 [coronavirus-2019/situation-reports/](https://www.who.int/emergencies/diseases/novel-coronavirus-2019/situation-reports/) (Geneva: WHO, 2020).
- 491 3 Dudas, G. *et al.* Virus genomes reveal factors that spread and sustained the Ebola
- 492 epidemic. *Nature* **544**, 309-315, doi:10.1038/nature22040 (2017).
- 493 4 Dudas, G., Carvalho, L. M., Rambaut, A. & Bedford, T. Correction: MERS-CoV spillover at
- 494 the camel-human interface. *Elife* **7**, doi:10.7554/eLife.37324 (2018).
- 495 5 Gardy, J. L. & Loman, N. J. Towards a genomics-informed, real-time, global pathogen
- 496 surveillance system. *Nat Rev Genet* **19**, 9-20, doi:10.1038/nrg.2017.88 (2018).
- 497 6 Gire, S. K. *et al.* Genomic surveillance elucidates Ebola virus origin and transmission
- 498 during the 2014 outbreak. *Science* **345**, 1369-1372, doi:10.1126/science.1259657 (2014).
- 499 7 Grubaugh, N. D. *et al.* Genomic epidemiology reveals multiple introductions of Zika virus
- 500 into the United States. *Nature* **546**, 401-405, doi:10.1038/nature22400 (2017).
- 501 8 Sabir, J. S. *et al.* Co-circulation of three camel coronavirus species and recombination of
- 502 MERS-CoVs in Saudi Arabia. *Science* **351**, 81-84, doi:10.1126/science.aac8608 (2016).
- 503 9 Lu, R. *et al.* Genomic characterisation and epidemiology of 2019 novel coronavirus:
- 504 implications for virus origins and receptor binding. *Lancet* **395**, 565-574,
- 505 doi:10.1016/S0140-6736(20)30251-8 (2020).
- 506 10 Zhu, N. *et al.* A Novel Coronavirus from Patients with Pneumonia in China, 2019. *N Engl J*
- 507 *Med* **382**, 727-733, doi:10.1056/NEJMoa2001017 (2020).
- 508 11 Zhou, P. *et al.* A pneumonia outbreak associated with a new coronavirus of probable bat
- 509 origin. *Nature* **579**, 270-273, doi:10.1038/s41586-020-2012-7 (2020).
- 510 12 Chen, L. *et al.* RNA based mNGS approach identifies a novel human coronavirus from two
- 511 individual pneumonia cases in 2019 Wuhan outbreak. *Emerg Microbes Infect* **9**, 313-319,
- 512 doi:10.1080/22221751.2020.1725399 (2020).
- 513 13 Wu, F. *et al.* A new coronavirus associated with human respiratory disease in China.
- 514 *Nature* **579**, 265-269, doi:10.1038/s41586-020-2008-3 (2020).
- 515 14 Drosten, C. *et al.* Evaluation of advanced reverse transcription-PCR assays and an
- 516 alternative PCR target region for detection of severe acute respiratory syndrome-
- 517 associated coronavirus. *J Clin Microbiol* **42**, 2043-2047, doi:10.1128/jcm.42.5.2043-
- 518 2047.2004 (2004).
- 519 15 Jonsdottir, H. R. & Dijkman, R. Coronaviruses and the human airway: a universal system
- 520 for virus-host interaction studies. *Virology* **13**, 24, doi:10.1186/s12985-016-0479-5 (2016).
- 521 16 Chan, J. F. *et al.* A familial cluster of pneumonia associated with the 2019 novel
- 522 coronavirus indicating person-to-person transmission: a study of a family cluster. *Lancet*
- 523 **395**, 514-523, doi:10.1016/S0140-6736(20)30154-9 (2020).
- 524 17 Holshue, M. L. *et al.* First Case of 2019 Novel Coronavirus in the United States. *N Engl J*
- 525 *Med* **382**, 929-936, doi:10.1056/NEJMoa2001191 (2020).
- 526 18 McCrone, J. T. *et al.* Stochastic processes constrain the within and between host
- 527 evolution of influenza virus. *Elife* **7**, e35962 (2018).
- 528 19 Ni, M. *et al.* Intra-host dynamics of Ebola virus during 2014. *Nat Microbiol* **1**, 16151,
- 529 doi:10.1038/nmicrobiol.2016.151 (2016).
- 530 20 Park, D. J. *et al.* Ebola Virus Epidemiology, Transmission, and Evolution during Seven
- 531 Months in Sierra Leone. *Cell* **161**, 1516-1526, doi:10.1016/j.cell.2015.06.007 (2015).
- 532 21 Domingo, E., Sheldon, J. & Perales, C. Viral quasispecies evolution. *Microbiol Mol Biol Rev*
- 533 **76**, 159-216, doi:10.1128/MMBR.05023-11 (2012).
- 534 22 Metsky, H. C. *et al.* Zika virus evolution and spread in the Americas. *Nature* **546**, 411-415,
- 535 doi:10.1038/nature22402 (2017).
- 536 23 Li, Q. *et al.* Reliable multiplex sequencing with rare index mis-assignment on DNB-based
- 537 NGS platform. *BMC Genomics* **20**, 215, doi:10.1186/s12864-019-5569-5 (2019).
- 538 24 Xia, Z. *et al.* Advanced Whole Genome Sequencing Using a Complete PCR-free Massively
- 539 Parallel Sequencing (MPS) Workflow. *bioRxiv* (2019).

- 540 25 Zou, L. *et al.* SARS-CoV-2 Viral Load in Upper Respiratory Specimens of Infected Patients. *N Engl J Med*, doi:10.1056/NEJMc2001737 (2020).  
541
- 542 26 Wood, D. E. & Salzberg, S. L. Kraken: ultrafast metagenomic sequence classification using  
543 exact alignments. *Genome Biol* **15**, R46, doi:10.1186/gb-2014-15-3-r46 (2014).
- 544 27 Chen, S., Zhou, Y., Chen, Y. & Gu, J. fastp: an ultra-fast all-in-one FASTQ preprocessor.  
545 *Bioinformatics* **34**, i884-i890, doi:10.1093/bioinformatics/bty560 (2018).
- 546 28 Chen, Y. *et al.* SOAPnuke: a MapReduce acceleration-supported software for integrated  
547 quality control and preprocessing of high-throughput sequencing data. *Gigascience* **7**, 1-  
548 6, doi:10.1093/gigascience/gix120 (2018).
- 549 29 Schmieder, R. & Edwards, R. Quality control and preprocessing of metagenomic datasets.  
550 *Bioinformatics* **27**, 863-864, doi:10.1093/bioinformatics/btr026 (2011).
- 551 30 Au, C. H., Ho, D. N., Kwong, A., Chan, T. L. & Ma, E. S. K. BAMClipper: removing primers  
552 from alignments to minimize false-negative mutations in amplicon next-generation  
553 sequencing. *Sci Rep* **7**, 1567, doi:10.1038/s41598-017-01703-6 (2017).
- 554 31 Bankevich, A. *et al.* SPAdes: a new genome assembly algorithm and its applications to  
555 single-cell sequencing. *J Comput Biol* **19**, 455-477, doi:10.1089/cmb.2012.0021 (2012).
- 556 32 Walker, B. J. *et al.* Pilon: an integrated tool for comprehensive microbial variant detection  
557 and genome assembly improvement. *PLoS One* **9**, e112963,  
558 doi:10.1371/journal.pone.0112963 (2014).
- 559 33 Li, H. & Durbin, R. Fast and accurate short read alignment with Burrows-Wheeler  
560 transform. *Bioinformatics* **25**, 1754-1760, doi:10.1093/bioinformatics/btp324 (2009).
- 561 34 Li, H. *et al.* The Sequence Alignment/Map format and SAMtools. *Bioinformatics* **25**, 2078-  
562 2079, doi:10.1093/bioinformatics/btp352 (2009).
- 563 35 Wickham, H. ggplot2. *Wiley Interdisciplinary Reviews: Computational Statistics* **3**, 180-185  
564 (2011).
- 565 36 Team, R. C. R: A language and environment for statistical computing. (2013).
- 566 37 Kolde, R. & Kolde, M. R. Package 'pheatmap'. *R Package* **1** (2015).
- 567 38 Kassambara, A. ggpubr: "ggplot2" based publication ready plots. *R package version 0.1 6*  
568 (2017).
- 569 39 Garrison, E. & Marth, G. Haplotype-based variant detection from short-read sequencing.  
570 *arXiv preprint arXiv:1207.3907* (2012).
- 571 40 Seemann, T. in *Snippy: fast bacterial variant calling from NGS reads* (WWW Document,  
572 2015).
- 573 41 Cingolani, P. *et al.* A program for annotating and predicting the effects of single nucleotide  
574 polymorphisms, SnpEff: SNPs in the genome of *Drosophila melanogaster* strain w1118;  
575 iso-2; iso-3. *Fly (Austin)* **6**, 80-92, doi:10.4161/fly.19695 (2012).
- 576 42 Li, R. *et al.* SOAP2: an improved ultrafast tool for short read alignment. *Bioinformatics* **25**,  
577 1966-1967, doi:10.1093/bioinformatics/btp336 (2009).
- 578 43 Kim, D., Paggi, J. M., Park, C., Bennett, C. & Salzberg, S. L. Graph-based genome  
579 alignment and genotyping with HISAT2 and HISAT-genotype. *Nat Biotechnol* **37**, 907-915,  
580 doi:10.1038/s41587-019-0201-4 (2019).
- 581 44 Wood, D. E., Lu, J. & Langmead, B. Improved metagenomic analysis with Kraken 2.  
582 *Genome Biol* **20**, 257, doi:10.1186/s13059-019-1891-0 (2019).
- 583 45 Lu, J., Breitwieser, F. P., Thielen, P. & Salzberg, S. L. Bracken: estimating species  
584 abundance in metagenomics data. *PeerJ Computer Science* **3**, e104 (2017).
- 585 46 Kircher, M., Sawyer, S. & Meyer, M. Double indexing overcomes inaccuracies in multiplex  
586 sequencing on the Illumina platform. *Nucleic Acids Res* **40**, e3, doi:10.1093/nar/gkr771  
587 (2012).  
588  
589

590 **Table 1.** Metatranscriptomic sequencing data summary of eight HCoV-19 positive clinic  
591 al samples collected from Guangzhou in February 2020

592

| Sample ID | Sample Type | Ct | # of Sequencing Read Pairs | # of HCoV-19 Read Pairs | % of HCoV-19 Read Pairs | Coverage (%) | Depth (X) |
|-----------|-------------|----|----------------------------|-------------------------|-------------------------|--------------|-----------|
| GZMU0047  | nasal swab  | 18 | 1,547,648,648              | 85,316,930              | 5.513                   | 100          | 113,021   |
| GZMU0016  | sputum      | 21 | 1,578,573,142              | 7,489,563               | 0.474                   | 99.96        | 12,734    |
| GZMU0048  | throat swab | 24 | 1,647,198,588              | 3,365,330               | 0.204                   | 99.91        | 6,508     |
| GZMU0044  | nasal swab  | 26 | 1,609,367,415              | 7,275,402               | 0.452                   | 99.92        | 12,758    |
| GZMU0030  | throat swab | 29 | 1,725,727,056              | 31,148                  | 0.002                   | 99.87        | 69        |
| GZMU0014  | sputum      | 30 | 1,596,713,550              | 46,199                  | 0.003                   | 99.9         | 95        |
| GZMU0042  | sputum      | 32 | 1,481,162,934              | 567,266                 | 0.038                   | 99.94        | 1,133     |
| GZMU0031  | anal swab   | 32 | 1,671,721,507              | 25,392                  | 0.002                   | 99.89        | 14        |

593

594 **Table 2.** General characteristics of the three approaches employed in this study

595

|                                                                    | <b>Metatranscriptomic sequencing</b> | <b>Hybrid capture-based sequencing</b> | <b>Multiplex PCR amplicon-based sequencing</b> |
|--------------------------------------------------------------------|--------------------------------------|----------------------------------------|------------------------------------------------|
| <b>Sequencing objective</b>                                        | Microbiome+Human                     | Target genome                          | Target genome                                  |
| <b>2nd strand synthesis</b>                                        | Y                                    | Y                                      | N                                              |
| <b>Fragmentation</b>                                               | Y                                    | Y                                      | N                                              |
| <b>Library preparation</b>                                         | Y                                    | Y                                      | N                                              |
| <b>PCR</b>                                                         | 18 cycles                            | 18+18 cycles                           | 15+25 cycles                                   |
| <b>Estimated time for pre-sequencing sample processing</b>         | 10.5 h                               | 20.5 h                                 | 7.5 h                                          |
| <b>Oligo synthesis</b>                                             | -                                    | 120 nt x 506                           | 40-60 nt x 2 x (113+14+10)                     |
| <b>Cost estimated for pre-sequencing sample processing</b>         | Moderate                             | High                                   | Low                                            |
| <b>Estimated minimum data for downstream analyses (Base level)</b> | >10Gb                                | Mb                                     | Mb                                             |
| <b>Evenness</b>                                                    | High                                 | Moderate                               | Low                                            |
| <b>Sensitivity</b>                                                 | +                                    | ++                                     | +++                                            |
| <b>Accuracy (SNV)</b>                                              | +++                                  | ++                                     | +++                                            |
| <b>Accuracy (iSNV)</b>                                             | +++                                  | ++                                     | +                                              |

596

597

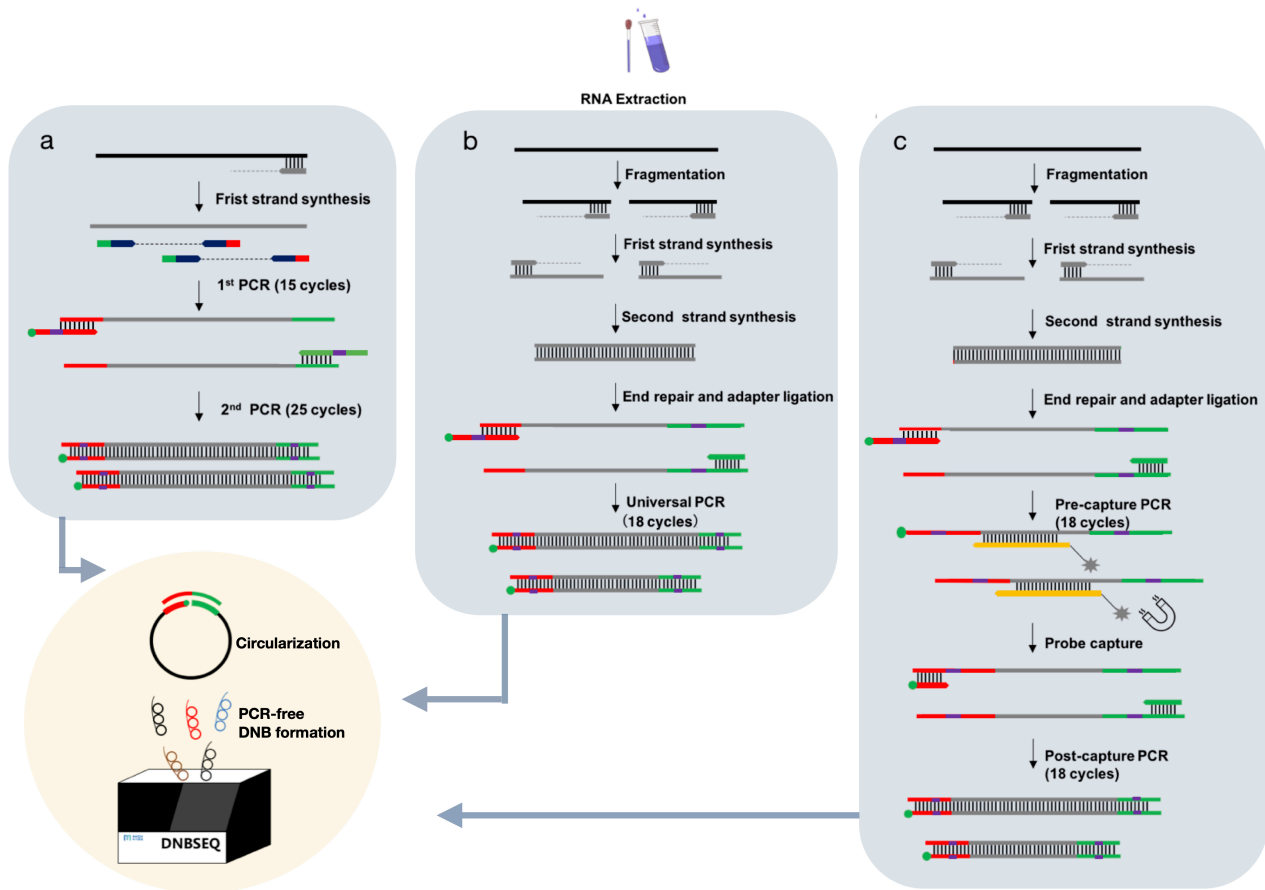

598

599 **Figure 1. The general workflow of multiple sequencing approaches adopted in this**  
 600 **study.** We employed unique dual indexing (UDI) strategy and DNB-based (DNA Nanoball)  
 601 PCR-free MPS platform to minimize index hopping and relevant sequencing errors<sup>23,24,46</sup>.  
 602 **a**, Amplicon-based enrichment, the dual indexing was integrated in the 2nd PCR. Navy,  
 603 multiplex PCR primers. **b**, Metatranscriptomic library preparations, the dual indexing was  
 604 integrated in the universal PCR. **c**, Library preparations and hybrid capture-based  
 605 enrichment, the 1st indexing was integrated in the pre-capture PCR while the 2nd  
 606 indexing was integrated in the post-capture PCR. Ocher, ssDNA probes. Red and green  
 607 lines represent adaptor sequences; green dots represent phosphate groups.

608

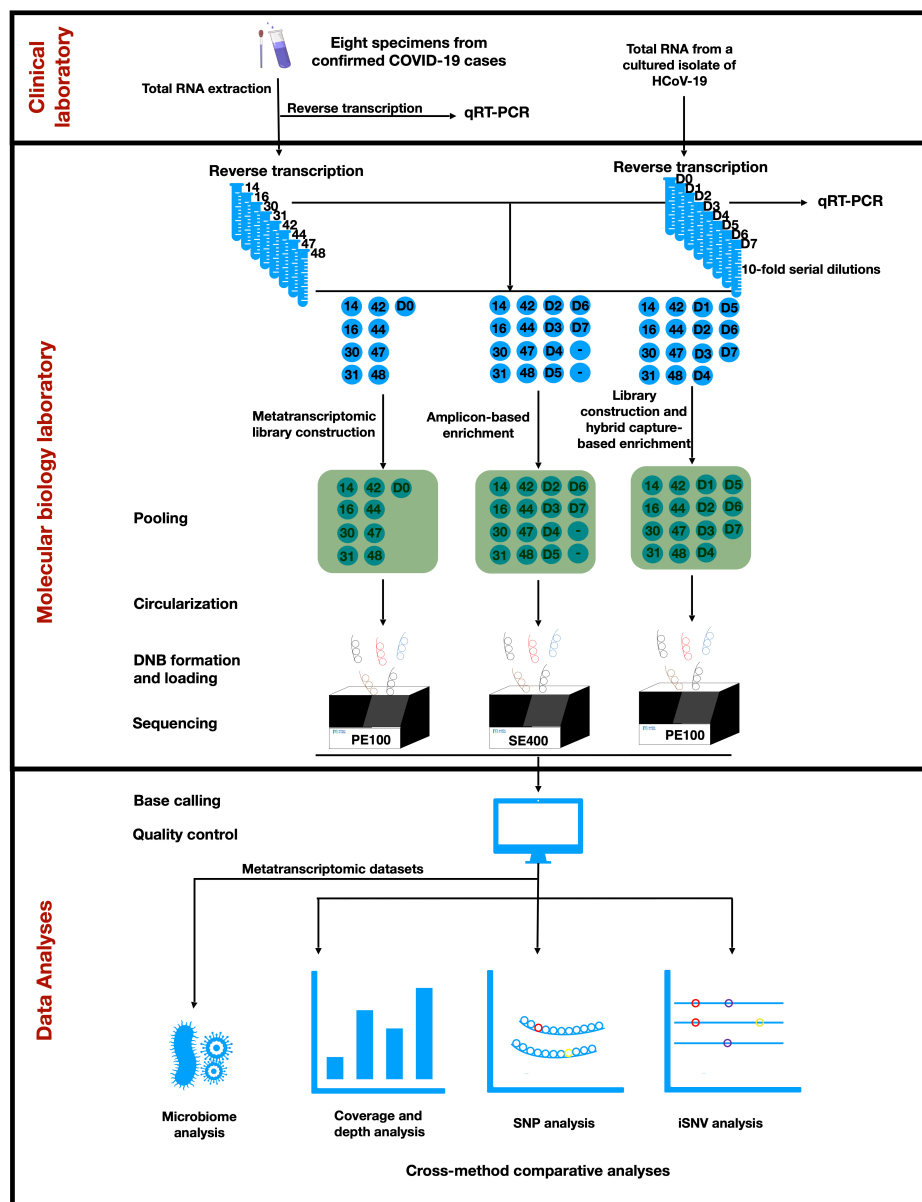

609 **Figure 2. Overview of the study design.** Eight clinical samples and serial dilutions of a  
 610 cultured isolate were subjected to direct metatranscriptomic library construction, amplicon-  
 611 based enrichment, and hybrid capture-based enrichment, respectively. Libraries generated  
 612 from each method were pooled, respectively. DNB, DNA Nanoball. 14, GZMU0014; 16,  
 613 GZMU0016; 30, GZMU0030; 31, GZMU0031; 42, GZMU0042; 44, GZMU0044; 47,  
 614 GZMU0047; 48, GZMU0048. D0, undiluted sample of the cultured isolate; D1-D7, seven  
 615 serial diluted samples of the cultured isolate, ranging from 1E+07 to 1E+01 genome  
 616 copies per mL, in 10-fold dilution. -, negative controls prepared from nuclease-free water  
 617 and human nucleic acids. PE100, paired-end 100-nt reads; SE400, single-end 100-nt  
 618 reads.

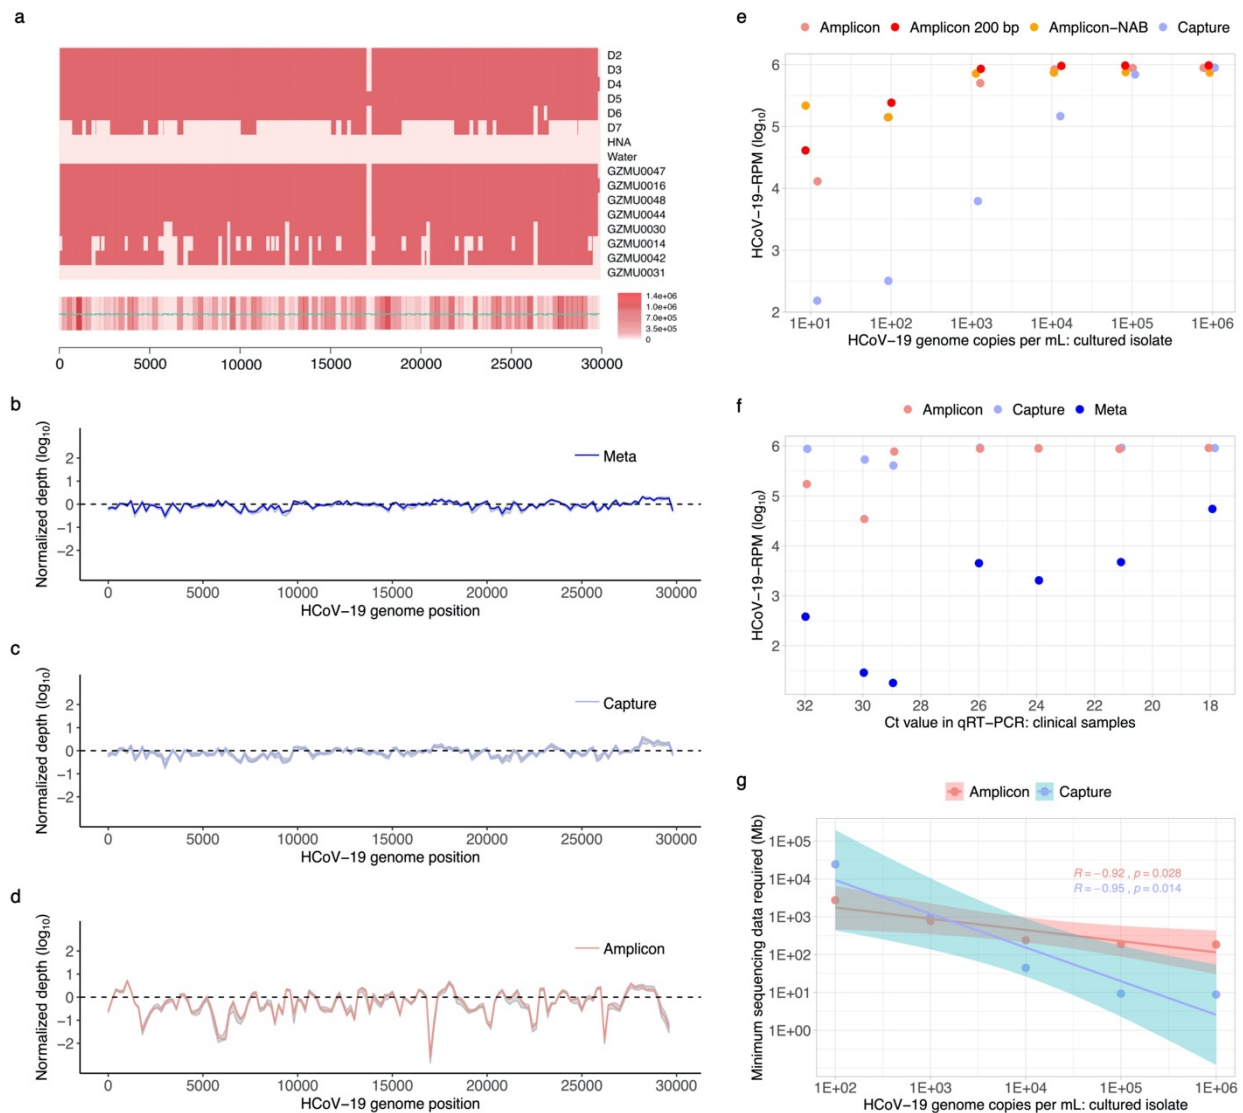

619

620

621

622

623

624

625

626

627

628

629

630

631

632

633

634

635

636

**Figure 3. Sequencing coverage and depth of the cultured isolate and eight clinical samples.** **a**, Amplicon sequencing coverage by sample (row) across the HCoV-19 genome. Pink, sequencing depth  $\geq 100\times$ ; heatmap (bottom) sums coverage across all samples. HNA, negative control prepared from human nucleic acids; water, negative control prepared from nuclease-free water. Green horizontal lines on heatmap, amplicon locations. Overlap regions between amplicons range from 59-209 bp. **b-d**, Normalized coverage across viral genomes of the clinical samples across methods. **e**, HCoV-19-RPM sequenced plotted against genome copies per mL for the cultured isolate. Three independent experiments were performed for amplicon sequencing. Pink,  $\sim 400$  bp amplicon-based sequencing including human and lambda phage nucleic acids background; red,  $\sim 200$  bp amplicon-based sequencing; orange,  $\sim 400$  bp amplicon-based sequencing excluding human and lambda phage nucleic acids background (NAB); light blue, capture sequencing. **f**, HCoV-19-RPM (Reads Per Million) sequenced plotted against qRT-PCR Ct value for the clinical samples. Pink, amplicon; light blue, capture; blue, meta. **g**, Estimated minimum amount of bases required by each method for high-confidence downstream analyses. Pink, amplicon; light blue, capture.



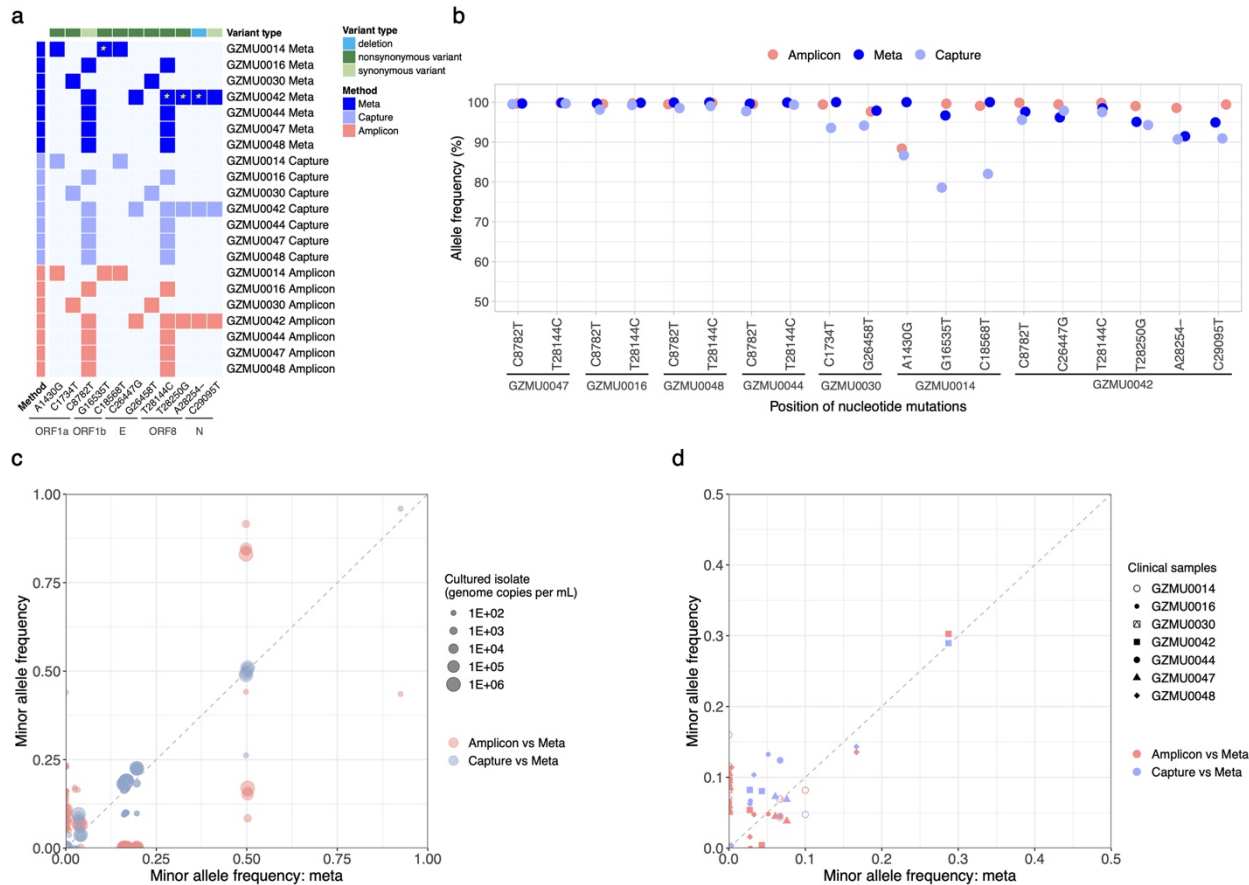

637  
638  
639  
640  
641  
642  
643  
644  
645  
646

**Figure 4. Between-sample and within-sample variants of HCoV-19 detected across methods.** **a**, SNVs detected between clinical samples against a reference genome (GISAID accession: EPI\_ISL\_402119). Alleles with  $\geq 80\%$  frequencies were called. \*, SNVs verified by Sanger sequencing. **b**, Allele frequencies of the identified SNVs. Pink, amplicon; light blue, capture; blue, meta. Minor allele frequencies detected in serial dilutions of the cultured isolate (**c**) and clinical samples (**d**) across methods. Pink, amplicon vs meta; light blue, capture vs meta. Minor alleles are defined with  $\geq 5\%$  and  $< 50\%$  frequencies. Besides general quality filter, iSNVs had to pass depth and strand bias filter as described in Methods.
